# Supplementary material for: Predicting Infectious Disease Using Deep Learning and Big Data
Source: PubMed Central journal article supplement (PMC6121625; doi:10.3390/ijerph15081596), 2018-07-27
Supplement: ijerph-15-01596-s001.pdf [file ijerph-15-01596-s001.pdf]

**Table S1.** The root mean squared error (RMSE) and prediction graphs of top 10 deep neural network (DNN) and long-short term memory (LSTM) models for chickenpox. The seasonal autoregressive integrated moving average (ARIMA) model is denoted as  $ARIMA(p, d, q)(P, D, Q)_S$ , where  $p$  is the order of the autoregressive part,  $d$  is the order of the differencing,  $q$  is the order of the moving-average process, and  $S$  is the length of the seasonal cycle.  $(P, D, Q)$  is the seasonal part of the model. The numbers in parentheses indicate each deep learning model's optimizer, activation, and number of epochs, respectively. (optimizer) 1: Adadelata, 2: Adagrad, 3: Adam, 4: Adamax, 5: Nadam, 6: RMSProp, and 7: SGD, (activation function) 1: ELU, 2: ReLU, 3: SELU, and 4: SoftPlus, (number of epochs) 1: 400, 2: 600, 3: 800, and 4: 1000.

| Ordinary least squares                                                            |         |                                                                                     | ARIMA(1, 0, 4)(0, 1, 2) <sub>7</sub>                                               |         |                                                                                       |
|-----------------------------------------------------------------------------------|---------|-------------------------------------------------------------------------------------|------------------------------------------------------------------------------------|---------|---------------------------------------------------------------------------------------|
| 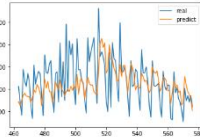 |         |                                                                                     |  |         |                                                                                       |
| DNN                                                                               |         |                                                                                     | LSTM                                                                               |         |                                                                                       |
| Model(o, a, e)                                                                    | RMSE    | Prediction                                                                          | Model(o, a, e)                                                                     | RMSE    | Prediction                                                                            |
| DNN(2, 3, 1)                                                                      | 74.1217 |    | LSTM(5, 2, 3)                                                                      | 81.3131 |    |
| DNN(3, 3, 2)                                                                      | 73.9389 |   | LSTM(1, 1, 4)                                                                      | 80.7757 |   |
| DNN(1, 3, 1)                                                                      | 73.7468 |  | LSTM(3, 1, 3)                                                                      | 80.7138 |  |
| DNN(6, 3, 1)                                                                      | 73.4877 |  | LSTM(1, 2, 2)                                                                      | 80.5656 |  |
| DNN(3, 3, 4)                                                                      | 73.1942 |  | LSTM(1, 2, 4)                                                                      | 80.3162 |  |
| DNN(5, 1, 1)                                                                      | 73.1822 |  | LSTM(2, 3, 1)                                                                      | 79.3532 |  |
| DNN(3, 1, 1)                                                                      | 73.0427 |  | LSTM(5, 4, 1)                                                                      | 77.9777 |  |
| DNN(6, 1, 4)                                                                      | 72.1856 |  | LSTM(2, 3, 2)                                                                      | 77.8980 |  |

|              |         |                                                                                   |               |         |                                                                                     |
|--------------|---------|-----------------------------------------------------------------------------------|---------------|---------|-------------------------------------------------------------------------------------|
| DNN(1, 2, 2) | 71.1555 | 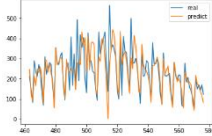 | LSTM(4, 3, 3) | 73.8884 |  |
| DNN(1, 2, 1) | 70.1595 |  | LSTM(5, 4, 3) | 70.0479 |  |

**Table S2.** The RMSE and prediction graphs of top 10 DNN and LSTM models for scarlet fever.

| Ordinary least squares                                                            |         |                                                                                     | ARIMA(1, 0, 1)(0, 1, 2) <sub>7</sub>                                               |         |                                                                                       |
|-----------------------------------------------------------------------------------|---------|-------------------------------------------------------------------------------------|------------------------------------------------------------------------------------|---------|---------------------------------------------------------------------------------------|
| 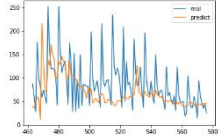 |         |                                                                                     |  |         |                                                                                       |
| DNN                                                                               |         |                                                                                     | LSTM                                                                               |         |                                                                                       |
| Model(o,a,e)                                                                      | RMSE    | Prediction                                                                          | Model(o,a,e)                                                                       | RMSE    | Prediction                                                                            |
| DNN(5, 3, 3)                                                                      | 35.3867 |    | LSTM(2, 1, 3)                                                                      | 38.3012 |    |
| DNN(2, 1, 3)                                                                      | 35.3123 |    | LSTM(2, 3, 1)                                                                      | 38.2312 |    |
| DNN(2, 1, 4)                                                                      | 35.1069 |    | LSTM(2, 1, 1)                                                                      | 37.6151 |    |
| DNN(1, 1, 3)                                                                      | 35.0984 |   | LSTM(4, 3, 1)                                                                      | 37.5653 |   |
| DNN(4, 1, 2)                                                                      | 34.6905 |  | LSTM(2, 1, 2)                                                                      | 37.5128 |  |
| DNN(1, 2, 1)                                                                      | 34.1304 |  | LSTM(5, 3, 1)                                                                      | 37.2380 |  |
| DNN(2, 2, 4)                                                                      | 34.0594 |  | LSTM(4, 1, 3)                                                                      | 36.4692 |  |
| DNN(2, 1, 1)                                                                      | 33.9251 |  | LSTM(6, 1, 1)                                                                      | 36.0120 |  |
| DNN(1, 2, 4)                                                                      | 33.5335 |  | LSTM(1, 1, 4)                                                                      | 34.9879 |  |
| DNN(1, 1, 2)                                                                      | 33.1039 |  | LSTM(4, 1, 1)                                                                      | 34.2074 |  |

**Table S3.** The RMSE and prediction graphs of top 10 DNN and LSTM models for malaria.

| Ordinary least squares |        |                                                                                     | ARIMA(1, 1, 1)(1, 0, 1) <sub>7</sub> |        |                                                                                       |
|------------------------|--------|-------------------------------------------------------------------------------------|--------------------------------------|--------|---------------------------------------------------------------------------------------|
| DNN                    |        |                                                                                     | LSTM                                 |        |                                                                                       |
| Model(o,a,e)           | RMSE   | Prediction                                                                          | Model(o,a,e)                         | RMSE   | Prediction                                                                            |
|                        |        | 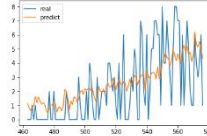   |                                      |        |     |
| DNN(6, 2, 3)           | 1.9228 |    | LSTM(1, 2, 1)                        | 1.9240 |    |
| DNN(3, 4, 1)           | 1.9216 |    | LSTM(2, 4, 4)                        | 1.9219 |    |
| DNN(5, 4, 1)           | 1.9212 |    | LSTM(2, 1, 4)                        | 1.9174 |    |
| DNN(3, 4, 4)           | 1.9200 |   | LSTM(6, 4, 2)                        | 1.9143 |   |
| DNN(2, 4, 2)           | 1.9193 |  | LSTM(1, 2, 3)                        | 1.9113 |  |
| DNN(1, 4, 3)           | 1.9146 |  | LSTM(2, 4, 3)                        | 1.9034 |  |
| DNN(1, 4, 4)           | 1.9143 |  | LSTM(4, 4, 3)                        | 1.8986 |  |
| DNN(1, 4, 2)           | 1.9070 |  | LSTM(4, 4, 1)                        | 1.890  |  |
| DNN(6, 4, 4)           | 1.9060 |  | LSTM(2, 4, 1)                        | 1.8754 |  |
| DNN(4, 4, 3)           | 1.8699 |  | LSTM(1, 4, 3)                        | 1.8641 |  |
